# Supplementary material
Source: HighWire-hosted journal article supplement (https://jmg.bmj.com/content/60/4/327)
Supplement: inline-supplementary-material-2 [file inline-supplementary-material-2.xlsx]

## Sheet: Table S1
Variant	Chromosome	Positiona	Reference allele	Effect allele	Effect allele frequency	Coefficient	Imputation qualityc			Reference panel
							GSA	iCOGS	OA
1_100880328_A_T	1	100880328	A	T	0.409678	0.0373	0.96641	0.94611	Genotyped	HRC1.1
1_10566215_A_G	1	10566215	A	G	0.329016	-0.0586	Genotyped	Genotyped	Genotyped	HRC1.1
1_110198129_CAAA_C	1	110198129	CAAA	C	0.775478	0.0458	0.88995	0.696023	0.835825	1000 Genomes
1_114445880_G_A	1	114445880	G	A	0.166363	0.0621	0.99904	0.99845	0.99862	HRC1.1
1_118141492_A_C	1	118141492	A	C	0.265682	0.0452	0.98442	0.984993	0.996635	HRC1.1
1_120257110_T_C	1	120257110	T	C	0.530949	0.0385	Genotyped	Genotyped	0.997385	HRC1.1
1_121280613_A_G	1	121280613	A	G	0.405315	0.0881	Genotyped	Genotyped	Genotyped	HRC1.1
1_121287994_A_G	1	121287994	A	G	0.106003	-0.0673	0.65928	0.85999	0.87281	1000 Genomes
1_145604302_C_CT	1	145604302	C	CT	0.351487	-0.0399	0.90736	0.753163	0.921485	1000 Genomes
1_149906413_T_C	1	149906413	T	C	0.401747	0.0548	Genotyped	0.909877	Genotyped	HRC1.1
1_155556971_G_A	1	155556971	G	A	0.2302	0.0499	0.99463	0.98185	0.9952	HRC1.1
1_168171052_CA_C	1	168171052	CA	C	0.109659	-0.068	0.93443	0.290883	0.85115	1000 Genomes
1_172328767_T_TA	1	172328767	T	TA	0.330483	-0.0435	0.86512	0.847313	0.87847	1000 Genomes
1_18807339_T_C	1	18807339	T	C	0.514474	-0.0564	Genotyped	0.822373	0.997325	HRC1.1
1_201437832_C_T	1	201437832	C	T	0.0559366	0.0917	Genotyped	0.828487	Genotyped	HRC1.1
1_202184600_C_T	1	202184600	C	T	0.399182	-0.0065	0.98069	0.973593	Genotyped	HRC1.1
1_203770448_T_A	1	203770448	T	A	0.271472	0.0498	0.96632	0.968627	0.994575	HRC1.1
1_204502514_T_TTCTGAAACAGGG	1	204502514	T	TTCTGAAACAGGG	0.80276	-0.0321	0.80557	0.79509	0.94646	1000 Genomes
1_208076291_G_A	1	208076291	G	A	0.333653	-0.0366	0.99411	0.93931	0.99121	HRC1.1
1_217053815_T_G	1	217053815	T	G	0.327999	0.0417	0.89355	0.74067	0.88091	HRC1.1
1_217220574_G_A	1	217220574	G	A	0.210653	-0.044	Genotyped	0.997483	0.98964	HRC1.1
1_220671050_C_T	1	220671050	C	T	0.241509	0.0418	0.91052	0.816313	0.973515	HRC1.1
1_242034263_A_G	1	242034263	A	G	0.0305037	0.1428	Genotyped	0.955893	Genotyped	HRC1.1
1_41380440_C_T	1	41380440	C	T	0.643842	0.0426	Genotyped	0.810667	0.989045	HRC1.1
1_41389220_T_C	1	41389220	T	C	0.0168565	0.155	0.96716	0.81871	0.9591	HRC1.1
1_46670206_TC_T	1	46670206	TC	T	0.297323	0.0447	0.91151	0.786773	0.918695	1000 Genomes
1_51467096_CT_C	1	51467096	CT	C	0.480027	0.0374	0.78238	0.687363	0.81304	1000 Genomes
1_7917076_G_A	1	7917076	G	A	0.38994	-0.0409	0.99599	0.779217	0.99481	HRC1.1
1_88156923_G_A	1	88156923	G	A	0.148676	0.0494	Genotyped	Genotyped	Genotyped	HRC1.1
1_88428199_C_A	1	88428199	C	A	0.247666	-0.0387	0.97389	Genotyped	Genotyped	HRC1.1
2_10138983_T_C	2	10138983	T	C	0.116007	0.0603	0.89388	0.89513	0.923375	1000 Genomes
2_121058254_A_G	2	121058254	A	G	0.704694	-0.0334	0.92027	0.998693	0.995815	HRC1.1
2_121089731_T_C	2	121089731	T	C	0.194298	-0.0427	0.90714	Genotyped	0.97105	HRC1.1
2_121159205_G_A	2	121159205	G	A	0.352749	-0.044	0.96165	0.86926	Genotyped	HRC1.1
2_121246568_T_C	2	121246568	T	C	0.896981	0.0992	0.99309	0.99515	Genotyped	HRC1.1
2_172974566_C_G	2	172974566	C	G	0.474272	-0.0473	0.97506	0.993573	0.99641	HRC1.1
2_174212910_A_G	2	174212910	A	G	0.844995	0.0593	0.99942	0.99947	Genotyped	HRC1.1
2_192381934_C_T	2	192381934	C	T	0.858832	0.0316	Genotyped	0.466333	Genotyped	HRC1.1
2_19315675_T_A	2	19315675	T	A	0.559907	-0.0331	0.9849	0.998667	0.99936	HRC1.1
2_202204741_T_C	2	202204741	T	C	0.720985	-0.0492	0.99319	Genotyped	Genotyped	HRC1.1
2_217920769_G_T	2	217920769	G	T	0.500088	-0.1318	Genotyped	Genotyped	Genotyped	HRC1.1
2_217955896_GA_G	2	217955896	GA	G	0.0381659	-0.2016	0.91766	0.83798	0.966385	1000 Genomes
2_218292158_C_G	2	218292158	C	G	0.730949	-0.0757	0.99859	0.998737	1	HRC1.1
2_218714845_G_A	2	218714845	G	A	0.391714	-0.0431	0.9111	0.666833	Genotyped	HRC1.1
2_241388857_C_A	2	241388857	C	A	0.977211	-0.1232	0.83489	0.73923	Genotyped	HRC1.1
2_25129473_A_G	2	25129473	A	G	0.408159	-0.0427	0.99826	0.530757	0.99981	HRC1.1
2_29179452_G_C	2	29179452	G	C	0.228739	-0.0066	0.99593	0.953513	Genotyped	HRC1.1
2_29615233_T_C	2	29615233	T	C	0.262166	-0.0427	0.98909	0.87611	0.995295	HRC1.1
2_39699510_C_CT	2	39699510	C	CT	0.46586	-0.0402	0.85822	0.433493	0.796885	1000 Genomes
2_70172587_G_A	2	70172587	G	A	0.278713	-0.0412	0.96309	0.82065	0.987255	HRC1.1
2_88358825_G_C	2	88358825	G	C	0.30805	0.0473	0.80858	0.45498	0.97147	HRC1.1
3_141112859_CTT_C	3	141112859	CTT	C	0.414934	0.0551	0.98689	0.986293	0.996365	1000 Genomes
3_172285237_G_A	3	172285237	G	A	0.213144	0.0422	Genotyped	0.995733	0.99808	HRC1.1
3_189774456_C_T	3	189774456	C	T	0.223461	-0.0478	0.99405	0.68415	0.99798	HRC1.1
3_27353716_C_A	3	27353716	C	A	0.525924	0.0748	Genotyped	Genotyped	Genotyped	HRC1.1
3_27388664_C_G	3	27388664	C	G	0.273463	0.0502	0.99382	0.999843	0.999275	HRC1.1
3_29294845_C_T	3	29294845	C	T	0.0162599	-0.1281	0.93435	0.884487	0.946265	HRC1.1
3_30684907_C_T	3	30684907	C	T	0.297549	0.0592	0.99857	Genotyped	Genotyped	HRC1.1
3_46888198_T_C	3	46888198	T	C	0.103236	-0.0806	0.99627	0.93368	0.99643	HRC1.1
3_4742251_A_G	3	4742251	A	G	0.380157	0.0616	0.99948	0.998803	Genotyped	HRC1.1
3_49709912_C_CT	3	49709912	C	CT	0.287282	-0.0367	0.94843	0.809863	0.92812	1000 Genomes
3_55970777_A_AT	3	55970777	A	AT	0.0304531	-0.1195	0.94047	0.25169	0.94591	1000 Genomes
3_59373745_C_T	3	59373745	C	T	0.429354	-0.0394	0.99632	0.698427	0.947915	HRC1.1
3_63887449_T_TTG	3	63887449	T	TTG	0.129725	0.0648	0.97762	0.96689	0.98653	1000 Genomes
3_71620370_T_G	3	71620370	T	G	0.638204	-0.0374	0.99303	0.821127	0.99263	HRC1.1
3_87037543_A_G	3	87037543	A	G	0.0920768	-0.0723	Genotyped	Genotyped	0.94341	HRC1.1
3_99403877_G_A	3	99403877	G	A	0.485202	-0.0376	0.99329	0.979067	0.996315	HRC1.1
4_106069013_G_T	4	106069013	G	T	0.228925	0.0471	0.99729	0.998403	Genotyped	HRC1.1
4_126752992_A_AAT	4	126752992	A	AAT	0.516677	-0.0377	0.79019	0.90589	0.95352	1000 Genomes
4_143467195_C_T	4	143467195	C	T	0.11146	-0.0569	0.96115	0.63891	0.97188	HRC1.1
4_151218296_CATATTT_C	4	151218296	CATATTT	C	0.653294	0.0388	0.98929	0.859657	0.983445	1000 Genomes
4_175842495_G_A	4	175842495	G	A	0.116089	-0.0898	0.99964	0.998383	Genotyped	HRC1.1
4_175847436_C_A	4	175847436	C	A	0.343344	0.0348	0.99241	0.967903	Genotyped	HRC1.1
4_187503758_A_T	4	187503758	A	T	0.447053	0.0357	0.93382	0.865863	0.98132	1000 Genomes
4_38784633_G_T	4	38784633	G	T	0.249283	0.0489	0.99862	0.99468	0.998575	HRC1.1
4_84370124_TAA_TA	4	84370124	TAA	TA	0.532408	-0.0464	0.89053	0.90142	0.919055	1000 Genomes
4_89240476_G_A	4	89240476	G	A	0.439526	0.0352	0.98333	Genotyped	0.985445	HRC1.1
4_92594859_TTCTTTC_T	4	92594859	TTCTTTC	T	0.444453	-0.0407	0.84194	0.34466	0.834345	1000 Genomes
5_104300273_G_T	5	104300273	G	T	0.180989	-0.0487	Genotyped	0.879007	0.995795	HRC1.1
5_122478676_C_A	5	122478676	C	A	0.744768	-0.0386	0.99887	0.985803	0.999805	HRC1.1
5_122705244_C_T	5	122705244	C	T	0.0306047	0.0944	0.97469	0.997957	0.995205	HRC1.1
5_1279790_C_T	5	1279790	C	T	0.259193	0.0617	Genotyped	Genotyped	Genotyped	HRC1.1
5_1296255_A_AG	5	1296255	A	AG	0.307249	-0.0549	0.99858	0.992043	0.998535	1000 Genomes
5_131640536_A_G	5	131640536	A	G	0.542693	0.0392	0.99524	0.990213	0.9864	HRC1.1
5_132407058_C_T	5	132407058	C	T	0.244971	-0.0388	0.96135	0.777183	0.997055	HRC1.1
5_1353077_T_C	5	1353077	T	C	0.0121465	0.1552	0.9292	0.934783	Genotyped	HRC1.1
5_158244083_C_T	5	158244083	C	T	0.568348	-0.0677	Genotyped	Genotyped	Genotyped	HRC1.1
5_16231194_G_C	5	16231194	G	C	0.559396	-0.0426	0.9988	0.99714	0.999935	HRC1.1
5_169591460_T_C	5	169591460	T	C	0.334458	0.0412	0.98805	0.940497	0.99921	HRC1.1
5_173358154_G_A	5	173358154	G	A	0.407449	0.0365	0.95671	0.978173	0.96242	HRC1.1
5_176134882_T_C	5	176134882	T	C	0.542245	0.0363	0.97797	0.771473	0.99767	HRC1.1
5_2777029_G_A	5	2777029	G	A	0.413865	0.0391	0.99948	0.96478	0.97809	HRC1.1
5_32579616_TCA_T	5	32579616	TCA	T	0.484391	0.0363	0.95122	0.97181	0.99952	1000 Genomes
5_345109_T_C	5	345109	T	C	0.0543993	0.084	0.93433	0.855653	0.95282	1000 Genomes
5_44508264_G_GT	5	44508264	G	GT	0.126534	-0.1177	0.91956	0.972757	0.96866	1000 Genomes
5_44619502_A_G	5	44619502	A	G	0.154915	-0.1101	0.8646	0.97614	0.98928	1000 Genomes
5_44649944_C_T	5	44649944	C	T	0.601044	0.0492	Genotyped	Genotyped	Genotyped	HRC1.1
5_44706498_A_G	5	44706498	A	G	0.248118	0.0497	Genotyped	Genotyped	Genotyped	HRC1.1
5_44853593_G_C	5	44853593	G	C	0.308104	-0.0336	0.95931	Genotyped	Genotyped	HRC1.1
5_52679539_C_CA	5	52679539	C	CA	0.099758	0.0571	0.92413	0.793087	0.957155	1000 Genomes
5_55662540_C_CT	5	55662540	C	CT	0.363131	-0.0458	0.93824	0.59517	0.95163	1000 Genomes
5_55965167_C_T	5	55965167	C	T	0.557607	0.0394	0.98973	0.809503	Genotyped	HRC1.1
5_56023083_T_G	5	56023083	T	G	0.158336	0.1366	Genotyped	Genotyped	Genotyped	HRC1.1
5_56042972_C_T	5	56042972	C	T	0.0520514	0.0865	0.9957	0.99987	0.999995	HRC1.1
5_56045081_T_C	5	56045081	T	C	0.165481	-0.0564	Genotyped	Genotyped	Genotyped	HRC1.1
5_58241712_C_T	5	58241712	C	T	0.574975	-0.0434	0.86181	0.67319	0.93761	1000 Genomes
5_71965007_G_A	5	71965007	G	A	0.257227	-0.041	0.92773	0.54244	0.886395	1000 Genomes
5_73234583_T_C	5	73234583	T	C	0.321263	-0.0363	0.97252	0.742307	0.98113	HRC1.1
5_77155397_GT_G	5	77155397	GT	G	0.346638	-0.0408	0.96159	0.508943	0.98932	1000 Genomes
5_79180995_G_GA	5	79180995	G	GA	0.175485	0.0328	0.9866	0.96509	0.97739	1000 Genomes
5_81512947_TA_T	5	81512947	TA	T	0.250319	-0.0598	0.97099	0.764467	0.999755	1000 Genomes
5_90789470_G_A	5	90789470	G	A	0.158042	-0.0564	0.92729	0.78885	Genotyped	HRC1.1
6_130341728_C_CT	6	130341728	C	CT	0.711606	0.0472	0.97269	0.952477	0.976315	1000 Genomes
6_13713366_G_C	6	13713366	G	C	0.569052	-0.0553	0.99836	0.98524	0.99931	HRC1.1
6_149595505_T_C	6	149595505	T	C	0.206123	-0.0476	0.99853	0.9413	0.996185	HRC1.1
6_151949806_A_C	6	151949806	A	C	0.30833	0.0703	0.99925	Genotyped	Genotyped	HRC1.1
6_151955914_A_G	6	151955914	A	G	0.0713254	0.1449	0.99917	0.99986	0.999955	1000 Genomes
6_152022664_CAAAAAAA_C	6	152022664	CAAAAAAA	C	0.611864	0.0137	0.8496	0.878733	0.89357	1000 Genomes
6_152023191_G_A	6	152023191	G	A	0.39649	0.0626	0.9967	Genotyped	Genotyped	HRC1.1
6_152055978_A_T	6	152055978	A	T	0.0626561	0.074	0.98526	0.99678	0.99648	HRC1.1
6_152432902_C_T	6	152432902	C	T	0.514554	0.0649	0.96373	0.997023	Genotyped	HRC1.1
6_16399557_C_T	6	16399557	C	T	0.329949	-0.0373	0.88276	0.704843	Genotyped	HRC1.1
6_169006947_C_G	6	169006947	C	G	0.52015	-0.0308	0.97782	0.952153	0.969965	HRC1.1
6_170332621_T_C	6	170332621	T	C	0.615803	0.0373	0.96231	0.959203	0.989855	HRC1.1
6_18783140_G_A	6	18783140	G	A	0.620023	0.0326	0.99477	0.879183	0.998995	HRC1.1
6_20537845_CA_C	6	20537845	CA	C	0.473264	-0.0391	0.82757	0.841347	0.87351	1000 Genomes
6_21923810_T_C	6	21923810	T	C	0.430343	-0.0321	0.99823	0.997977	0.999465	HRC1.1
6_27425644_G_C	6	27425644	G	C	0.0814924	-0.0737	0.95968	0.929523	0.9917	HRC1.1
6_43227141_G_A	6	43227141	G	A	0.0984603	-0.064	0.99559	0.95406	0.9974	HRC1.1
6_82263549_AAT_A	6	82263549	AAT	A	0.426244	0.0477	0.86568	0.797433	0.87924	1000 Genomes
6_85912194_CAA_C	6	85912194	CAA	C	0.0603855	0.0762	0.91399	0.67488	0.91184	1000 Genomes
6_87803819_T_C	6	87803819	T	C	0.277033	0.0383	0.95864	0.68971	0.98631	1000 Genomes
7_101552440_G_A	7	101552440	G	A	0.125546	-0.0568	0.89833	0.590997	0.98955	1000 Genomes
7_102481842_T_C	7	102481842	T	C	0.341616	0.0418	0.99377	0.98764	0.99568	HRC1.1
7_130656911_C_T	7	130656911	C	T	0.373408	-0.0476	0.95433	0.964157	0.985695	HRC1.1
7_130674481_G_A	7	130674481	G	A	0.297097	0.0416	Genotyped	0.891267	Genotyped	HRC1.1
7_139943702_CT_C	7	139943702	CT	C	0.538096	0.0582	0.88834	0.711617	0.89458	1000 Genomes
7_144048902_G_T	7	144048902	G	T	0.228399	-0.0563	0.83341	0.792347	0.83307	1000 Genomes
7_21940960_A_G	7	21940960	A	G	0.351473	-0.0467	Genotyped	Genotyped	0.99496	HRC1.1
7_25569548_C_T	7	25569548	C	T	0.166745	-0.0486	0.98406	0.828303	0.969245	HRC1.1
7_28869017_G_A	7	28869017	G	A	0.107172	-0.0572	0.9793	0.995803	0.993705	HRC1.1
7_55192256_A_C	7	55192256	A	C	0.549726	-0.0349	0.96737	Genotyped	Genotyped	HRC1.1
7_91459189_A_ATT	7	91459189	A	ATT	0.32858	0.0452	0.89572	0.88443	0.904475	1000 Genomes
7_94113799_T_C	7	94113799	T	C	0.279207	0.0449	Genotyped	0.997973	0.999395	HRC1.1
7_98005235_G_A	7	98005235	G	A	0.16267	-0.0467	0.95607	Genotyped	Genotyped	HRC1.1
7_99948655_T_G	7	99948655	T	G	0.210941	0.042	0.95651	0.333837	0.922695	1000 Genomes
8_102483100_T_C	8	102483100	T	C	0.0966816	0.0593	0.97446	0.955103	0.963555	HRC1.1
8_106358620_A_T	8	106358620	A	T	0.100331	-0.0745	0.95684	0.787867	0.95799	HRC1.1
8_117209548_A_G	8	117209548	A	G	0.64449	-0.0417	Genotyped	0.976443	Genotyped	HRC1.1
8_120862186_A_G	8	120862186	A	G	0.131792	0.0527	0.98747	0.97634	0.981055	HRC1.1
8_124563705_T_C	8	124563705	T	C	0.145791	0.0477	0.9524	0.923243	0.989475	HRC1.1
8_124571581_G_A	8	124571581	G	A	0.417312	0.034	0.97615	0.955217	0.995485	HRC1.1
8_124739913_T_G	8	124739913	T	G	0.398483	0.0466	0.99877	0.98987	0.984485	HRC1.1
8_128213561_C_CA	8	128213561	C	CA	0.415348	-0.043	Genotyped	0.846023	0.87473	1000 Genomes
8_128370949_C_G	8	128370949	C	G	0.402038	0.0642	0.98131	0.999357	0.99935	HRC1.1
8_128372172_A_G	8	128372172	A	G	0.544568	0.0597	0.98691	0.999023	0.999665	HRC1.1
8_129199566_G_A	8	129199566	G	A	0.171721	0.0615	0.99844	0.999657	Genotyped	HRC1.1
8_143669254_A_G	8	143669254	A	G	0.339	-0.0346	0.97592	0.70571	0.96813	HRC1.1
8_170692_T_C	8	170692	T	C	0.222716	0.0477	Genotyped	0.560387	0.859845	HRC1.1
8_17787610_CT_C	8	17787610	CT	C	0.623003	-0.0377	0.86426	0.66686	0.8592	1000 Genomes
8_23447496_A_G	8	23447496	A	G	0.648666	-0.0389	0.98992	Genotyped	Genotyped	HRC1.1
8_23663653_C_A	8	23663653	C	A	0.403204	0.0335	0.9966	0.998927	0.99977	HRC1.1
8_29509616_A_C	8	29509616	A	C	0.675632	-0.0601	Genotyped	Genotyped	Genotyped	HRC1.1
8_36858483_A_G	8	36858483	A	G	0.18203	-0.076	Genotyped	0.981467	Genotyped	HRC1.1
8_76230943_A_G	8	76230943	A	G	0.828166	0.0755	0.99877	0.99985	0.999915	HRC1.1
8_76333056_C_T	8	76333056	C	T	0.0878064	0.1129	Genotyped	0.997243	Genotyped	HRC1.1
8_76378165_G_T	8	76378165	G	T	0.3595	-0.0391	Genotyped	0.956993	Genotyped	HRC1.1
9_110303808_TAA_T	9	110303808	TAA	T	0.206527	0.0797	0.85569	0.827247	0.98803	1000 Genomes
9_110837073_A_G	9	110837073	A	G	0.0630024	0.1158	Genotyped	Genotyped	Genotyped	HRC1.1
9_110837176_C_T	9	110837176	C	T	0.174994	0.0653	Genotyped	Genotyped	Genotyped	HRC1.1
9_110849525_G_T	9	110849525	G	T	0.597673	0.0153	0.90565	0.909053	Genotyped	HRC1.1
9_110885479_C_T	9	110885479	C	T	0.622202	0.0877	0.98764	Genotyped	Genotyped	HRC1.1
9_119313486_A_G	9	119313486	A	G	0.408726	-0.0462	0.99237	0.966917	0.991595	HRC1.1
9_129424719_A_G	9	129424719	A	G	0.457743	-0.0382	0.96592	0.927587	0.972275	HRC1.1
9_136146597_C_T	9	136146597	C	T	0.27274	0.04	Genotyped	0.97723	0.998275	HRC1.1
9_21964882_CAAAA_C	9	21964882	CAAAA	C	0.318401	0.055	0.91496	0.949083	0.95573	1000 Genomes
9_22041998_C_G	9	22041998	C	G	0.139321	0.0289	Genotyped	Genotyped	Genotyped	HRC1.1
9_36928288_T_C	9	36928288	T	C	0.534878	0.0249	0.98134	0.97479	0.99125	HRC1.1
9_6880263_A_G	9	6880263	A	G	0.285481	0.0348	0.93965	0.784333	Genotyped	HRC1.1
9_87782211_T_C	9	87782211	T	C	0.509365	0.0361	Genotyped	Genotyped	Genotyped	HRC1.1
9_98362587_T_C	9	98362587	T	C	0.0940217	0.0576	0.99128	0.991827	0.993845	HRC1.1
10_114777670_C_T	10	114777670	C	T	0.463148	0.0472	0.99914	0.999527	Genotyped	HRC1.1
10_115128491_T_C	10	115128491	T	C	0.784577	-0.0592	Genotyped	Genotyped	Genotyped	HRC1.1
10_123095209_G_A	10	123095209	G	A	0.326916	-0.0538	0.98487	0.930313	0.99362	1000 Genomes
10_123340107_A_G	10	123340107	A	G	0.065632	0.1508	0.99508	0.9937	0.99787	HRC1.1
10_123340431_GC_G	10	123340431	GC	G	0.59626	-0.2408	0.9964	0.99552	0.997735	1000 Genomes
10_123349324_A_T	10	123349324	A	T	0.048439	-0.2609	0.95722	0.975407	0.98315	HRC1.1
10_13892298_G_A	10	13892298	G	A	0.437646	0.0371	0.98155	0.968423	Genotyped	HRC1.1
10_22032942_A_G	10	22032942	A	G	0.708544	-0.058	Genotyped	Genotyped	Genotyped	HRC1.1
10_22477776_ACC_A	10	22477776	ACC	A	0.0201635	0.1687	0.91168	0.851547	0.945245	1000 Genomes
10_22861490_A_C	10	22861490	A	C	0.936979	0.0875	0.98623	0.99446	0.9901	HRC1.1
10_38523626_C_A	10	38523626	C	A	0.369776	0.0404	0.75928	0.654193	0.902375	1000 Genomes
10_5794652_A_G	10	5794652	A	G	0.213664	0.047	0.98814	Genotyped	Genotyped	HRC1.1
10_64299890_A_G	10	64299890	A	G	0.160255	-0.1345	0.96244	0.98839	0.985305	HRC1.1
10_64819996_G_T	10	64819996	G	T	0.195798	0.0472	Genotyped	Genotyped	Genotyped	HRC1.1
10_71335574_C_T	10	71335574	C	T	0.317869	-0.0404	0.76577	0.473583	0.93017	1000 Genomes
10_80851257_G_T	10	80851257	G	T	0.617209	-0.0805	Genotyped	Genotyped	Genotyped	HRC1.1
10_80886726_A_G	10	80886726	A	G	0.163132	0.0762	0.98559	0.9974	Genotyped	HRC1.1
10_95292187_CAA_C	10	95292187	CAA	C	0.823361	-0.0512	0.80098	0.70446	0.917615	1000 Genomes
11_103614438_T_G	11	103614438	T	G	0.657162	0.0147	0.99611	0.802813	0.994755	HRC1.1
11_108267402_C_CA	11	108267402	C	CA	0.417326	-0.0022	0.95419	0.962887	0.99657	1000 Genomes
11_111696440_T_C	11	111696440	T	C	0.622134	-0.0396	0.99423	0.99793	0.997825	HRC1.1
11_116727936_A_T	11	116727936	A	T	0.204577	-0.0423	0.9992	0.98676	0.99831	HRC1.1
11_122966626_A_G	11	122966626	A	G	0.292233	-0.0383	0.99404	0.824677	0.9968	HRC1.1
11_129243417_T_G	11	129243417	T	G	0.86197	-0.0543	0.99177	0.946947	0.993615	HRC1.1
11_129461016_A_G	11	129461016	A	G	0.601574	0.0453	0.99989	0.9994	Genotyped	HRC1.1
11_18664241_T_G	11	18664241	T	G	0.729325	0.0461	0.98633	0.649577	0.95579	HRC1.1
11_1895708_C_A	11	1895708	C	A	0.392411	-0.0762	0.98845	0.994693	Genotyped	HRC1.1
11_42844441_C_T	11	42844441	C	T	0.327905	-0.0336	0.97688	0.7402	Genotyped	HRC1.1
11_433617_T_C	11	433617	T	C	0.79694	-0.0437	0.9604	0.744027	0.986525	HRC1.1
11_44368892_G_A	11	44368892	G	A	0.549522	0.0374	0.99427	0.992713	0.993215	HRC1.1
11_46318032_C_G	11	46318032	C	G	0.0658572	-0.0748	0.96906	0.695657	0.921165	HRC1.1
11_65553492_C_A	11	65553492	C	A	0.186722	0.0425	0.99576	0.99375	0.9994	HRC1.1
11_65572431_G_A	11	65572431	G	A	0.488575	-0.0347	0.94464	0.97463	0.999245	1000 Genomes
11_69328130_A_T	11	69328130	A	T	0.213036	-0.0423	0.97233	0.98435	0.98445	HRC1.1
11_69330983_G_A	11	69330983	G	A	0.125009	0.1022	0.99401	0.999633	0.999985	HRC1.1
11_69331418_C_T	11	69331418	C	T	0.0752919	0.1782	Genotyped	0.99508	0.99791	HRC1.1
11_803017_A_G	11	803017	A	G	0.516722	0.0457	Genotyped	Genotyped	0.99659	HRC1.1
12_103097887_C_T	12	103097887	C	T	0.117463	0.0546	0.98765	0.966157	0.99204	HRC1.1
12_111600134_G_T	12	111600134	G	T	0.371548	-0.0442	0.90906	0.869757	Genotyped	HRC1.1
12_115108136_T_C	12	115108136	T	C	0.261522	0.0465	0.94803	0.93077	Genotyped	HRC1.1
12_115796577_A_G	12	115796577	A	G	0.195875	-0.0428	0.99792	0.99877	0.9992	HRC1.1
12_115835836_T_C	12	115835836	T	C	0.417088	-0.0813	Genotyped	Genotyped	Genotyped	HRC1.1
12_120832146_C_T	12	120832146	C	T	0.15925	0.0516	Genotyped	0.887417	Genotyped	HRC1.1
12_14413931_G_C	12	14413931	G	C	0.261886	0.0484	Genotyped	Genotyped	Genotyped	HRC1.1
12_28149568_C_T	12	28149568	C	T	0.117003	-0.062	0.99752	Genotyped	Genotyped	HRC1.1
12_28174817_C_T	12	28174817	C	T	0.242133	-0.0856	Genotyped	Genotyped	Genotyped	HRC1.1
12_28347382_C_T	12	28347382	C	T	0.215307	-0.0521	0.93643	0.97044	0.97461	1000 Genomes
12_29140260_G_A	12	29140260	G	A	0.912578	0.0647	0.98205	0.933123	0.99771	HRC1.1
12_293626_A_G	12	293626	A	G	0.371135	0.0401	0.97109	0.643903	0.99738	HRC1.1
12_57146069_T_G	12	57146069	T	G	0.103687	-0.0579	Genotyped	Genotyped	Genotyped	HRC1.1
12_70798355_A_T	12	70798355	A	T	0.180957	0.0469	0.99484	0.892967	0.99812	HRC1.1
12_83064195_G_GA	12	83064195	G	GA	0.0991575	0.0671	0.87362	0.0780433	0.888515	1000 Genomes
12_85004551_C_T	12	85004551	C	T	0.495534	0.0348	0.99119	0.99592	0.944125	1000 Genomes
12_96027759_A_G	12	96027759	A	G	0.296272	-0.0867	Genotyped	Genotyped	Genotyped	HRC1.1
13_32839990_G_A	13	32839990	G	A	0.017404	0.0424	0.88704	0.811763	Genotyped	HRC1.1
13_32972626_A_T	13	32972626	A	T	0.0079011	0.2687	Genotyped	0.997347	0.991325	HRC1.1
13_43501356_A_G	13	43501356	A	G	0.830284	0.0517	0.97399	0.959953	0.985815	HRC1.1
13_73806982_T_C	13	73806982	T	C	0.315317	0.0345	0.92507	0.97312	Genotyped	HRC1.1
13_73960952_A_G	13	73960952	A	G	0.761778	0.0399	0.98823	0.99926	Genotyped	HRC1.1
14_105213978_T_G	14	105213978	T	G	0.45883	0.0399	0.97769	0.984757	0.990505	HRC1.1
14_37128564_C_A	14	37128564	C	A	0.212229	-0.0733	0.99784	0.9977	Genotyped	HRC1.1
14_37228504_C_T	14	37228504	C	T	0.443449	0.039	0.99765	0.77572	0.99837	HRC1.1
14_68660428_T_C	14	68660428	T	C	0.83446	-0.0474	Genotyped	Genotyped	Genotyped	HRC1.1
14_68979835_T_C	14	68979835	T	C	0.258083	-0.0911	Genotyped	Genotyped	Genotyped	HRC1.1
14_91751788_TC_T	14	91751788	TC	T	0.69339	0.038	0.94447	0.9537	0.99659	1000 Genomes
14_91841069_A_G	14	91841069	A	G	0.344356	0.0513	Genotyped	Genotyped	Genotyped	HRC1.1
14_93070286_C_T	14	93070286	C	T	0.170886	-0.0577	Genotyped	0.842757	Genotyped	HRC1.1
15_100905819_A_C	15	100905819	A	C	0.110014	-0.0608	0.93778	0.445307	0.900785	1000 Genomes
15_46680811_C_A	15	46680811	C	A	0.0115482	-0.1973	0.81542	0.394523	0.816865	1000 Genomes
15_50694306_A_G	15	50694306	A	G	0.344598	-0.0417	Genotyped	0.836887	0.98475	HRC1.1
15_66630569_G_A	15	66630569	G	A	0.641275	-0.0369	0.98184	0.8643	0.945695	HRC1.1
15_67457698_A_G	15	67457698	A	G	0.0496177	0.0782	0.88518	Genotyped	Genotyped	HRC1.1
15_75750383_T_C	15	75750383	T	C	0.260434	-0.0413	0.95399	0.961997	0.959445	HRC1.1
15_91512267_G_T	15	91512267	G	T	0.135331	-0.0589	0.99584	Genotyped	Genotyped	HRC1.1
16_10706580_G_A	16	10706580	G	A	0.0694807	-0.074	0.98367	0.76929	0.973115	HRC1.1
16_23007047_G_T	16	23007047	G	T	0.0236359	0.1218	0.99794	0.72749	0.968985	HRC1.1
16_4008542_CAAAAA_C	16	4008542	CAAAAA	C	0.821296	-0.0329	0.86659	0.297393	0.866885	1000 Genomes
16_4106788_C_A	16	4106788	C	A	0.26429	-0.03	0.89191	0.284283	0.911845	1000 Genomes
16_52538825_C_A	16	52538825	C	A	0.25617	0.1147	0.9688	0.999837	0.999915	HRC1.1
16_52599188_C_T	16	52599188	C	T	0.24063	0.107	Genotyped	0.978633	Genotyped	HRC1.1
16_53809123_C_T	16	53809123	C	T	0.420085	-0.0704	Genotyped	0.99874	Genotyped	HRC1.1
16_53861139_C_T	16	53861139	C	T	0.760412	-0.0338	0.99623	0.99614	Genotyped	HRC1.1
16_53861592_G_A	16	53861592	G	A	0.366317	-0.0337	0.9935	0.990307	0.999495	HRC1.1
16_54682064_G_A	16	54682064	G	A	0.485033	0.0477	Genotyped	0.92074	Genotyped	HRC1.1
16_6963972_C_G	16	6963972	C	G	0.783475	0.0354	0.98125	0.84227	0.97738	HRC1.1
16_80648296_A_G	16	80648296	A	G	0.230292	0.0839	0.99961	0.996157	0.999785	HRC1.1
16_85145977_T_C	16	85145977	T	C	0.485592	-0.0211	0.79623	0.59078	0.975615	HRC1.1
16_87086492_T_C	16	87086492	T	C	0.258559	-0.0469	0.99118	0.96632	0.99671	HRC1.1
17_29168077_G_T	17	29168077	G	T	0.261323	-0.0568	0.96943	0.778013	0.98071	1000 Genomes
17_39251123_T_C	17	39251123	T	C	0.0681914	0.0799	0.90653	0.627993	0.88902	HRC1.1
17_40127060_T_C	17	40127060	T	C	0.0569783	0.0174	0.75859	0.356727	Genotyped	HRC1.1
17_40485239_G_T	17	40485239	G	T	0.0874064	-0.0571	0.97028	0.975073	0.96071	HRC1.1
17_40744470_G_A	17	40744470	G	A	0.0123684	0.2017	0.95824	0.88295	0.98486	HRC1.1
17_43212339_C_CT	17	43212339	C	CT	0.228414	0.0438	0.94472	0.553153	0.946235	1000 Genomes
17_44283858_G_A	17	44283858	G	A	0.189469	-0.054	0.61934	0.769677	0.940705	1000 Genomes
17_53209774_A_C	17	53209774	A	C	0.302301	-0.0793	0.98852	0.99075	0.994545	HRC1.1
17_77781725_A_G	17	77781725	A	G	0.503833	-0.0401	Genotyped	0.892647	Genotyped	HRC1.1
18_11696613_C_T	18	11696613	C	T	0.137945	-0.0381	Genotyped	0.533723	Genotyped	HRC1.1
18_20634253_C_T	18	20634253	C	T	0.640292	-0.0415	0.95578	0.93311	0.98803	HRC1.1
18_24125857_T_C	18	24125857	T	C	0.421421	0.0346	0.98115	0.96339	Genotyped	HRC1.1
18_24337424_C_G	18	24337424	C	G	0.620462	0.0455	0.9655	0.965207	0.991705	HRC1.1
18_24518050_AT_A	18	24518050	AT	A	0.277275	-0.0599	0.97708	0.83908	0.993185	1000 Genomes
18_25407513_C_G	18	25407513	C	G	0.71257	0.0399	0.98086	0.996153	0.985975	HRC1.1
18_29981526_G_A	18	29981526	G	A	0.0474344	-0.1058	0.98312	0.996017	0.99811	HRC1.1
18_42411803_G_C	18	42411803	G	C	0.0716814	-0.0877	0.99843	0.986553	0.998755	HRC1.1
18_42888797_T_C	18	42888797	T	C	0.351913	-0.0542	Genotyped	Genotyped	Genotyped	HRC1.1
19_13249921_G_T	19	13249921	G	T	0.0513077	0.0956	0.99113	0.801693	0.994965	HRC1.1
19_17393925_C_A	19	17393925	C	A	0.29577	0.0378	0.99807	0.999753	Genotyped	HRC1.1
19_18569492_C_T	19	18569492	C	T	0.348068	-0.0719	0.99515	0.98994	0.9998	HRC1.1
19_19517054_C_CGGGCG	19	19517054	C	CGGGCG	0.353715	0.0437	0.93823	0.583357	0.963285	1000 Genomes
19_44283031_T_C	19	44283031	T	C	0.351884	0.0619	0.94949	0.87168	Genotyped	HRC1.1
19_46166073_T_C	19	46166073	T	C	0.607369	-0.036	0.97026	0.827887	0.969935	HRC1.1
19_55816678_C_T	19	55816678	C	T	0.362631	-0.0359	0.99334	0.98987	0.99412	HRC1.1
20_11379842_T_C	20	11379842	T	C	0.948341	0.0844	0.86617	0.72203	0.932025	HRC1.1
20_41613706_C_G	20	41613706	C	G	0.792843	0.0315	0.99493	0.938753	0.96118	HRC1.1
20_52296849_G_A	20	52296849	G	A	0.240047	0.044	0.8521	Genotyped	0.962725	HRC1.1
20_5948227_G_A	20	5948227	G	A	0.0628452	0.076	Genotyped	Genotyped	Genotyped	HRC1.1
21_16364756_T_G	21	16364756	T	G	0.173215	0.0646	Genotyped	0.487517	Genotyped	HRC1.1
21_16566350_A_G	21	16566350	A	G	0.0873347	0.0595	0.98501	0.97185	Genotyped	HRC1.1
21_16574455_C_A	21	16574455	C	A	0.316733	-0.0707	Genotyped	0.980107	0.998075	HRC1.1
21_47762932_G_A	21	47762932	G	A	0.0355463	0.0946	0.95406	0.91638	0.96053	HRC1.1
22_19766137_C_T	22	19766137	C	T	0.379839	-0.0367	0.97893	0.945193	0.989725	HRC1.1
22_29121087_A_G	22	29121087	A	G	0.00536567	0.1839	Genotyped	Genotyped	Genotyped	HRC1.1
22_29135543_G_A	22	29135543	G	A	0.0869813	0.0654	0.99947	0.99544	0.992435	HRC1.1
22_29203724_C_T	22	29203724	C	T	0.0209188	0.1405	0.97466	0.957267	0.999405	HRC1.1
22_29551872_A_G	22	29551872	A	G	0.984562	-0.1716	0.96361	0.95562	0.97814	HRC1.1
22_38583315_AAAAG_AAAAGAAAG	22	38583315	AAAAG	AAAAGAAAG	0.280467	-0.0471	0.8393	0.872547	0.948435	1000 Genomes
22_39343916_T_A	22	39343916	T	A	0.254083	0.0407	Genotyped	0.94457	Genotyped	HRC1.1
22_40904707_CT_C	22	40904707	CT	C	0.109871	0.1148	0.90298	0.90664	0.95767	1000 Genomes
22_43433100_C_T	22	43433100	C	T	0.114445	-0.06	0.9939	0.992217	0.98034	HRC1.1
22_45319953_G_A	22	45319953	G	A	0.416619	-0.0134	0.95415	0.775067	0.993485	1000 Genomes
22_46283297_G_A	22	46283297	G	A	0.111687	0.0736	0.89766	0.486597	0.9471	HRC1.1
abased on build 37
bEffect allele frequency estimates for controls in the complete Oncoarray dataset described by Mavaddat et al. 2019
cAverage imputation quality of individuals genotyped with the GSA, iCOGS and OncoArray respectively
